# Supplementary material
Source: PubMed Central journal article supplement (PMC5967676)
Supplement: CJN.09630917SupplementaryData.pdf [file CJN.09630917SupplementaryData.pdf]

**Supplementary Table 1:** Risk of LVH or ESRD and model discrimination by different systolic BP index parameters in adjusted analyses using CKiD equation.\*

| <b>Metric</b><br>N=471                                                                | <b>Adjusted OR**</b><br><b>for LVH<sup>1</sup></b><br>(95% CI) | <b>Adjusted C-</b><br><b>statistic</b><br>(95% CI) | <b>Adjusted HR** of</b><br><b>ESRD<sup>1</sup></b><br>(95% CI) | <b>Adjusted C-</b><br><b>statistic</b><br>(95% CI) |
|---------------------------------------------------------------------------------------|----------------------------------------------------------------|----------------------------------------------------|----------------------------------------------------------------|----------------------------------------------------|
| Clinic systolic BP index at a single visit                                            | 1.8 (1.3-2.5)                                                  | 0.79 (0.74-0.85)                                   | 1.2 (1.0-1.5)                                                  | 0.89 (0.86-0.91)                                   |
| Mean of all systolic BP indices at up to two visits                                   | 2.1 (1.4-3.0)                                                  | 0.80 (0.74-0.86)<br>Reference                      | 1.2 (1.0-1.5)                                                  | 0.89 (0.86-0.92)                                   |
| Mean ABP wake systolic BP index                                                       | 2.1 (1.4-3.1)                                                  | 0.80 (0.75-0.86)                                   | 1.3 (1.0-1.6)                                                  | 0.89 (0.85-0.91)                                   |
| Mean ABP sleep systolic BP index                                                      | 1.7 (1.2-2.4)                                                  | 0.80 (0.74-0.86)                                   | 1.2 (1.0-1.5)                                                  | 0.89 (0.84-0.91)                                   |
| Mean of all systolic BP indices at up to two visits + ABP mean wake systolic BP index | Clinic:<br>1.5 (1.0-2.1)<br>Ambulatory:<br>1.6 (1.0-2.6)       | 0.81 (0.76-0.87)                                   | Clinic:<br>1.1 (0.8-1.4)<br>Ambulatory:<br>1.2 (0.9-1.7)       | 0.89 (0.86-0.91)                                   |

<sup>1</sup>Adjusted for age, sex, race, cause of CKD, BMI z-score, duration of CKD, urine protein/creatinine ratio, serum albumin, hemoglobin, anti-hypertensive use, and baseline eGFR (by bedside Schwartz)

\*No differences were noted in the c-statistic of any metric compared to that for the reference group, which is mean of clinic systolic BPs taken at up to two visits

\*\* OR = odds ratio; HR = hazard ratio, all reported per 0.1 increase in SBP index

**Supplementary Table 2:** Association between BP parameters at Year 1 and risk of LVH at Year 3 with model discrimination in unadjusted and adjusted analyses.

| <b>Metric</b><br>N=272                                                                | <b>Unadjusted OR**<br/>for LVH<sup>1</sup></b><br>(95% CI) | <b>Unadjusted C-<br/>statistic</b><br>(95% CI) | <b>Adjusted OR** of<br/>LVH<sup>1</sup></b><br>(95% CI)  | <b>Adjusted C-<br/>statistic</b><br>(95% CI) |
|---------------------------------------------------------------------------------------|------------------------------------------------------------|------------------------------------------------|----------------------------------------------------------|----------------------------------------------|
| Clinic systolic BP index at a single visit                                            | 1.8 (1.2-2.6)                                              | 0.66 (0.56-0.77)                               | 1.7 (1.1-2.6)                                            | 0.83 (0.76-0.91)                             |
| Mean of all systolic BP indices at up to two visits                                   | 1.7 (1.1-2.6)                                              | 0.62 (0.51-0.73)<br>Reference                  | 1.5 (0.9-2.5)                                            | 0.83 (0.75-0.90)                             |
| Mean ABP wake systolic BP index                                                       | 0.9 (0.6-1.5)                                              | 0.52 (0.42-0.63)                               | 1.0 (0.6-1.8)                                            | 0.82 (0.75-0.89)                             |
| Mean ABP sleep systolic BP index                                                      | 0.9 (0.6-1.4)                                              | 0.51 (0.41-0.62)                               | 1.1 (0.7-1.7)                                            | 0.82 (0.74-0.89)                             |
| Mean of all systolic BP indices at up to two visits + ABP mean wake systolic BP index | Clinic:<br>2.1 (1.3-3.4)<br>Ambulatory:<br>0.6 (0.4-1.1)   | 0.64 (0.52-0.75)                               | Clinic:<br>1.8 (1.0-3.3)<br>Ambulatory:<br>0.7 (0.4-1.4) | 0.83 (0.75-0.91)                             |

<sup>1</sup>Adjusted for age, sex, race, cause of CKD, BMI z-score, duration of CKD, urine protein/creatinine ratio, serum albumin, hemoglobin, anti-hypertensive use, and baseline eGFR (by bedside Schwartz); N=264 included due to missing co-variates

\*No differences were noted in the c-statistic of any metric compared to that for the reference group, which is mean of clinic systolic BPs taken at up to two visits

\*\* OR = odds ratio; HR = hazard ratio, all reported per 0.1 increase in systolic BP index
